# Supplementary material for: An efficient Au(i) catalyst for double hydroarylation of alkynes with heteroarenes
Source: Royal Society of Chemistry journal article supplement (doi:10.1039/c4nj02170c), 2015-01-01
Supplement: c4nj02170c1.pdf [file c4nj02170c1.pdf]

## Supporting information

### An Efficient Au (I) Catalyst for Double Hydroarylation of Alkynes with Heteroarenes

Cuicui Luo, Hongwei Yang\*, Rongfang Mao, Chunxu Lu, Guangbin Cheng\*

School of Chemical Engineering, Nanjing University of Science and Technology, Xiaolingwei 200, Nanjing, Jiangsu, China. Fax: +86(25)84303286; E-mail: hyang@mail.njust.edu.cn (H. Yang); gcheng@mail.njust.edu.cn (G. Cheng).

#### Copies of the $^1\text{H}$ and $^{13}\text{C}$ NMR spectra for compounds 4aa, 3aa–3ag and 3ba-3ia

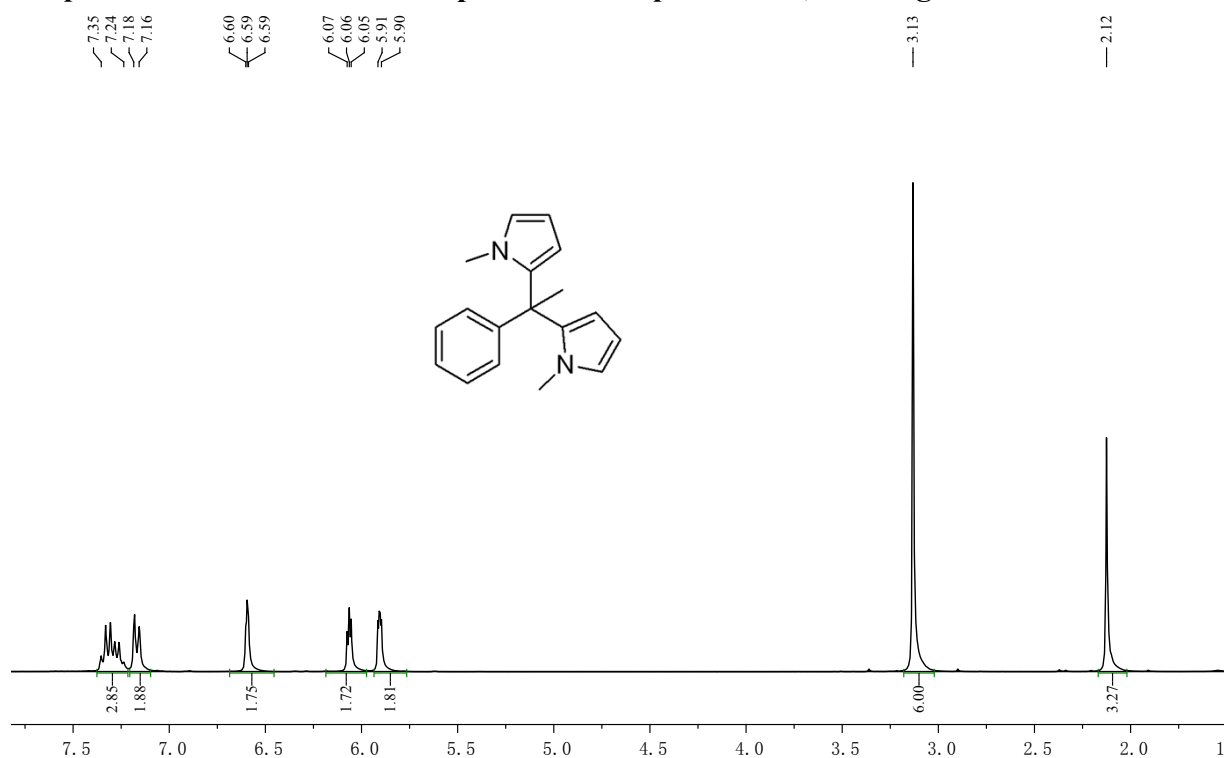

Figure S1.  $^1\text{H}$  NMR spectra (300 MHz) of 3aa

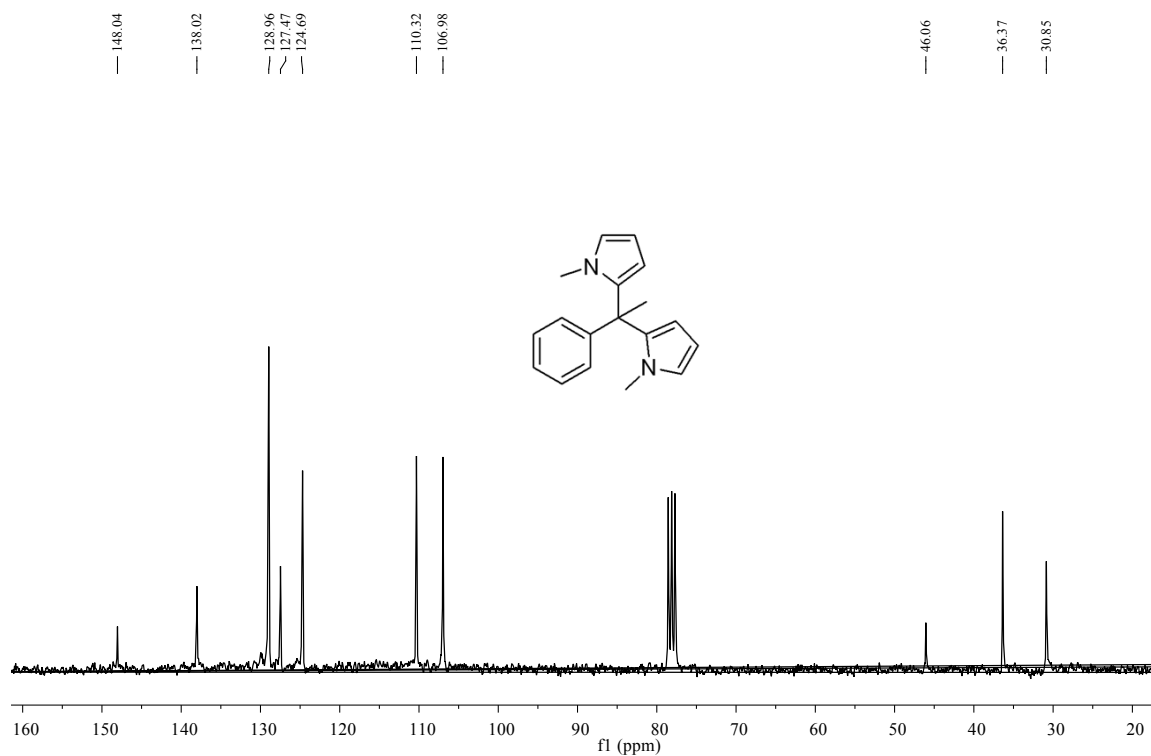

Figure S2. <sup>13</sup>C NMR spectra (300 MHz) of 3aa

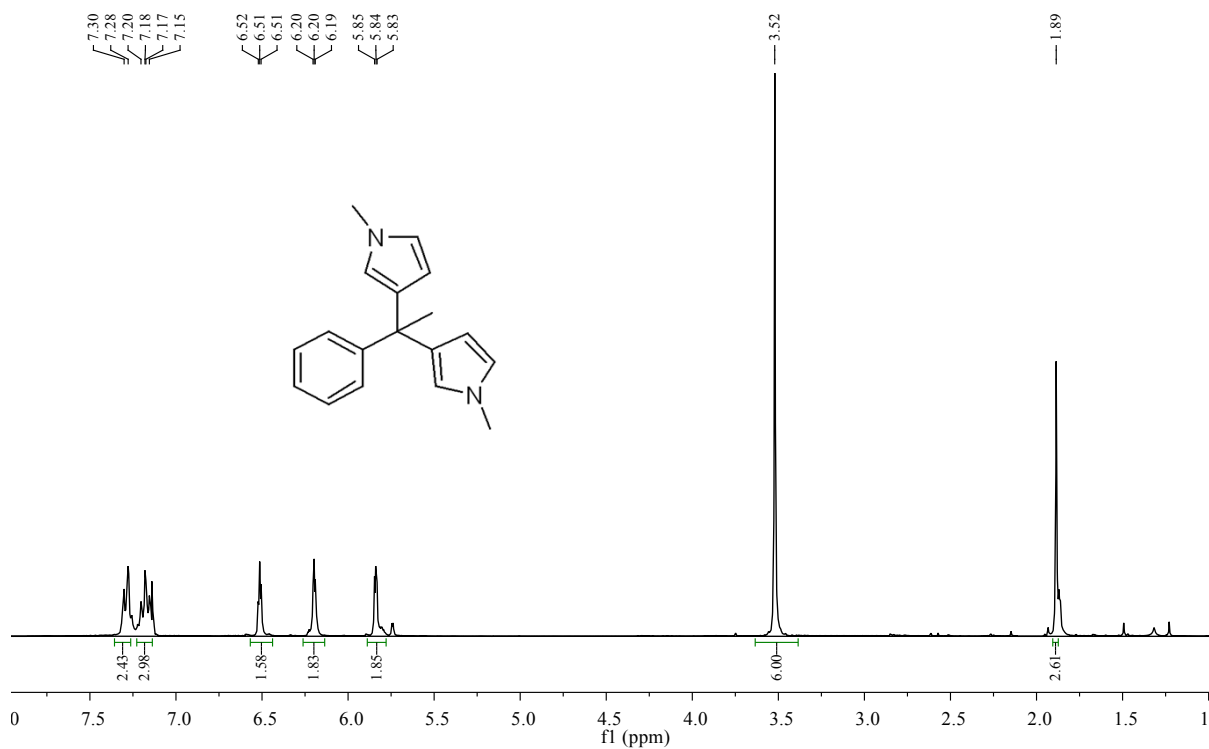

Figure S3. <sup>1</sup>H NMR spectra (300 MHz) of 4aa

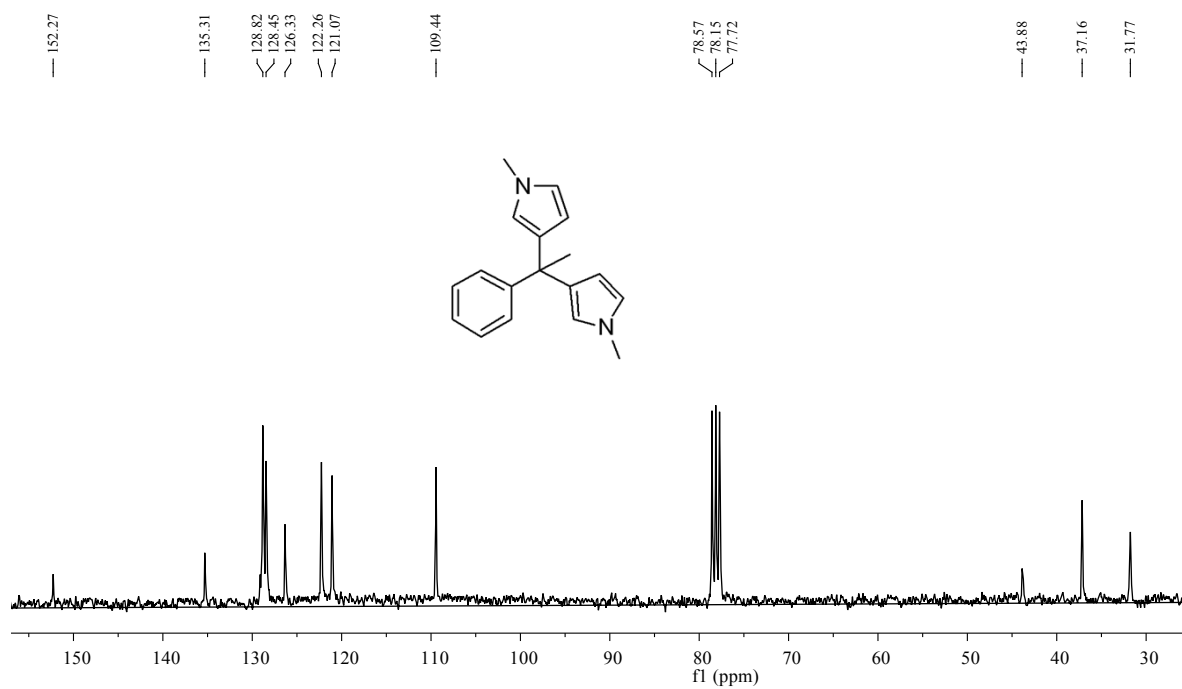

Figure S4. <sup>13</sup>C NMR spectra (300 MHz) of 4aa

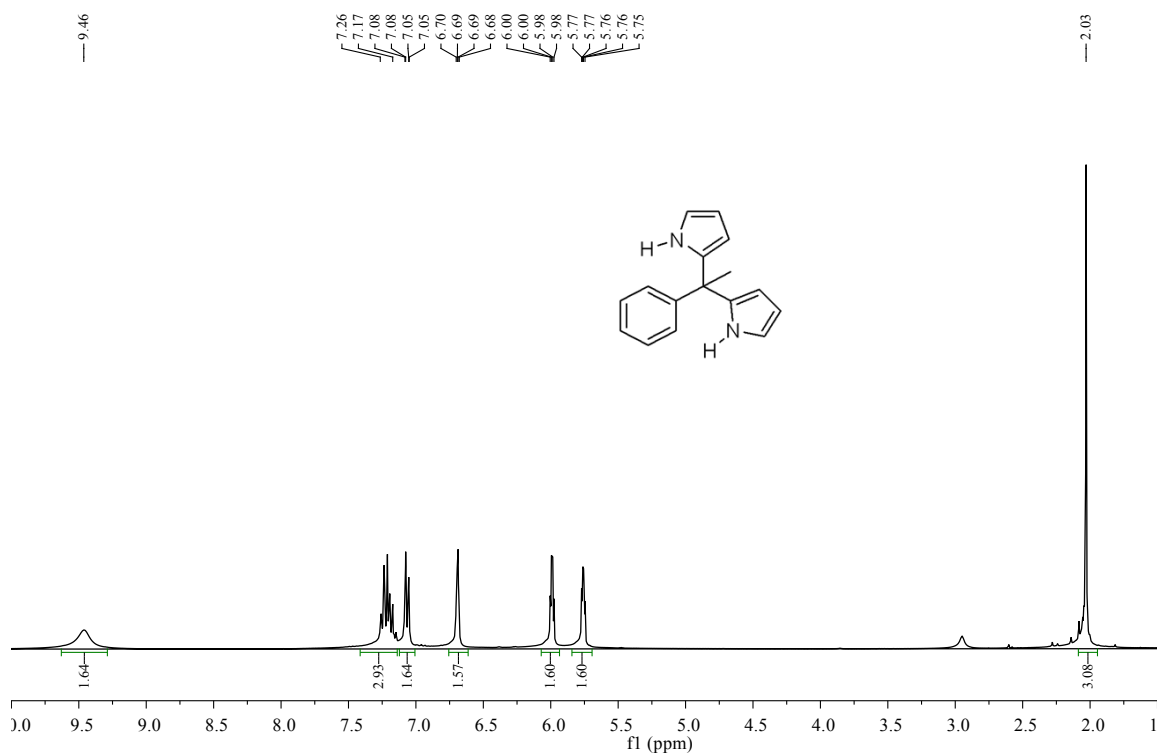

Figure S5. <sup>1</sup>H NMR spectra (300 MHz) of 3ab

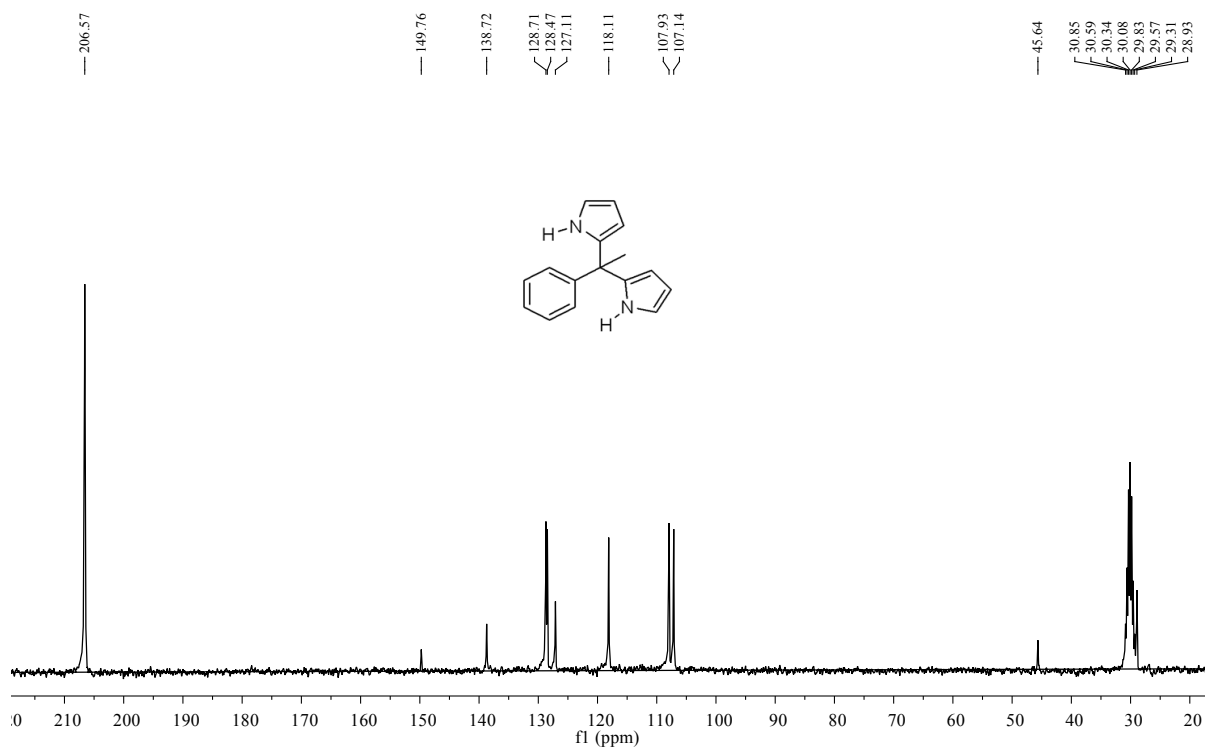

Figure S6. <sup>13</sup>C NMR spectra (300 MHz) of 3ab

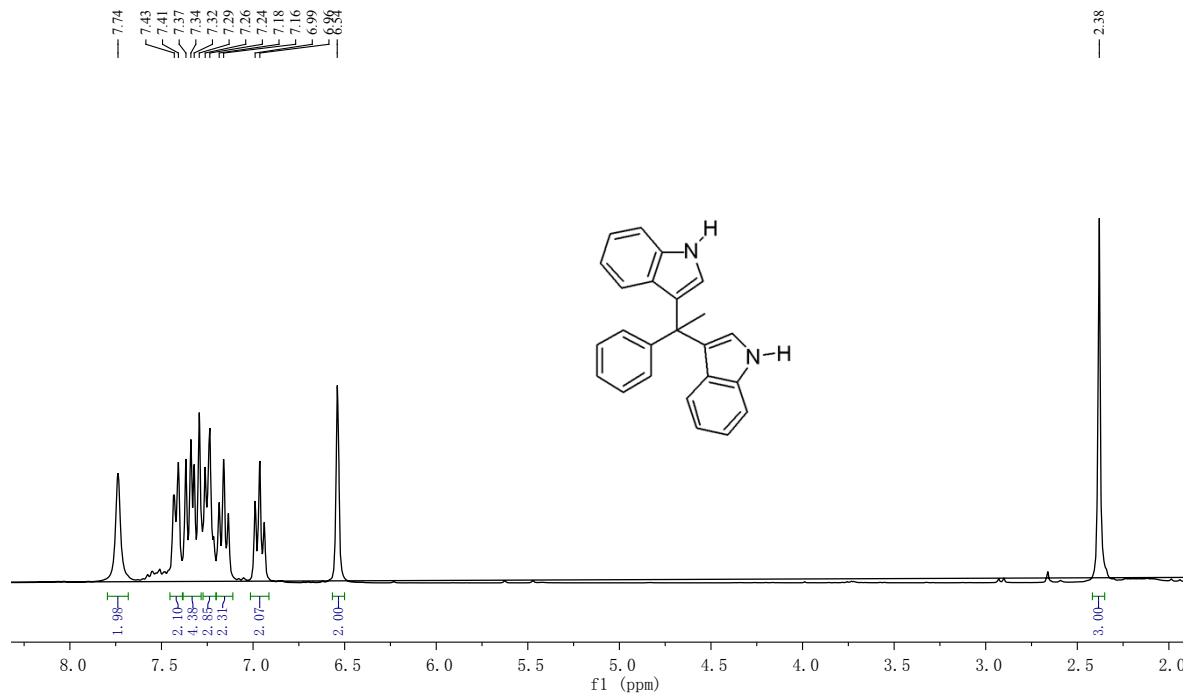

Figure S7. <sup>1</sup>H NMR spectra (300 MHz) of 3ae

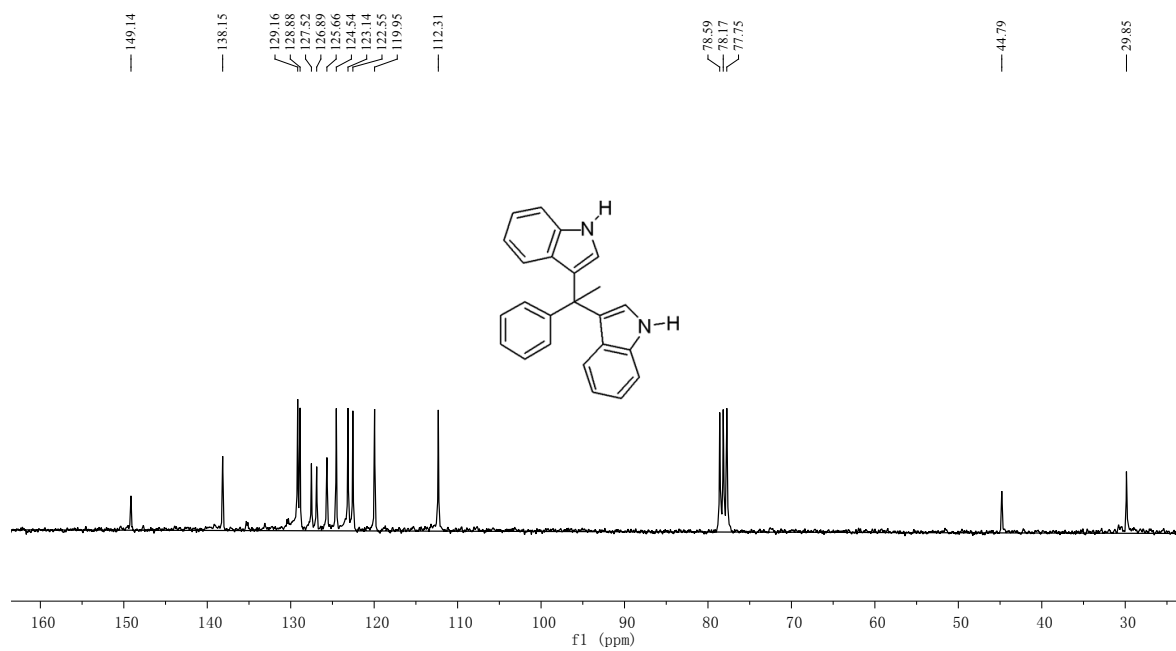

**Figure S8.** <sup>13</sup>C NMR spectra (300 MHz) of **3ae**

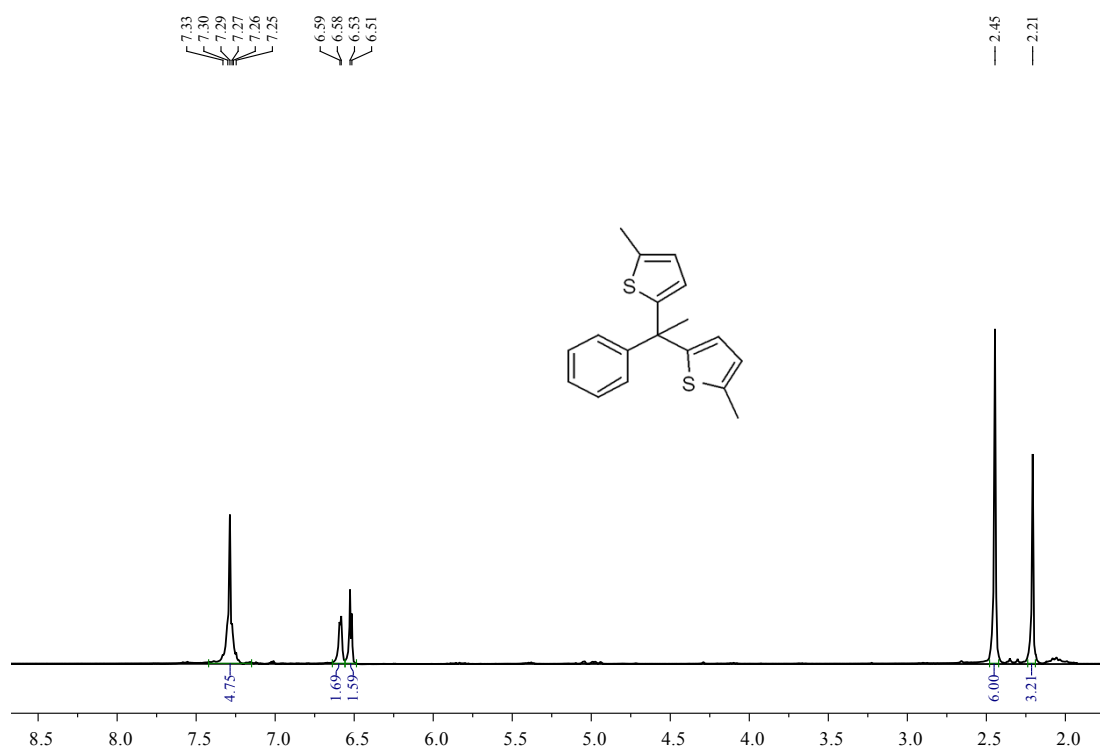

**Figure S9.** <sup>1</sup>H NMR spectra (300 MHz) of **3af**

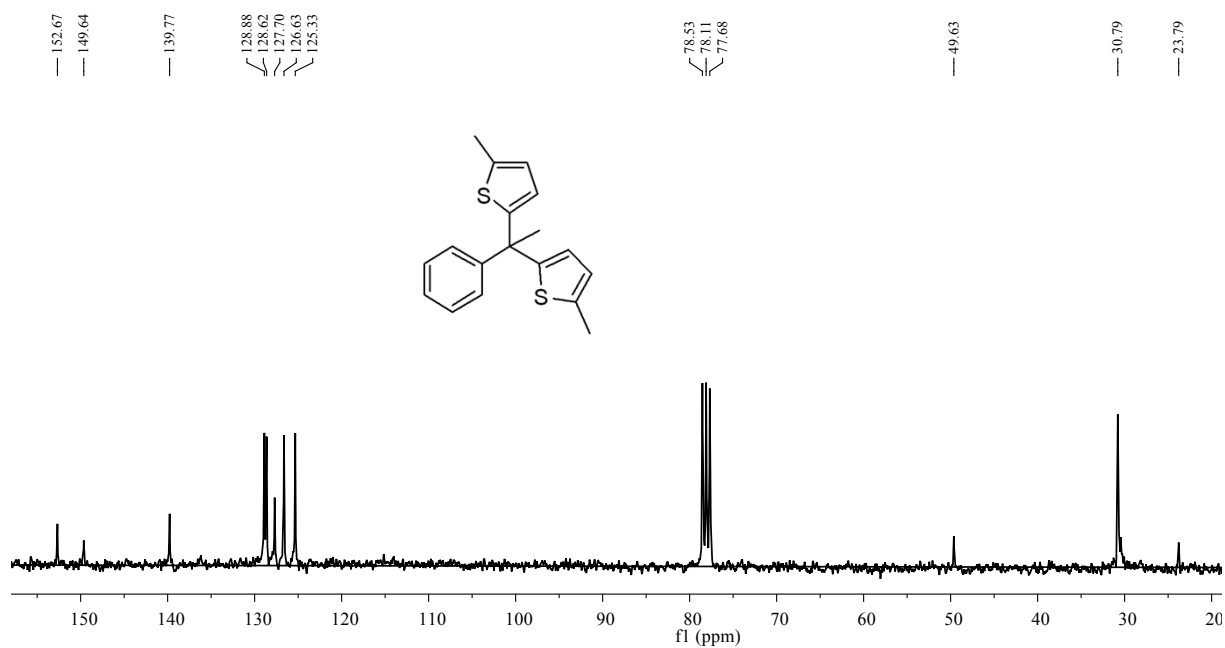

Figure S10.  $^{13}\text{C}$  NMR spectra (300 MHz) of **3af**

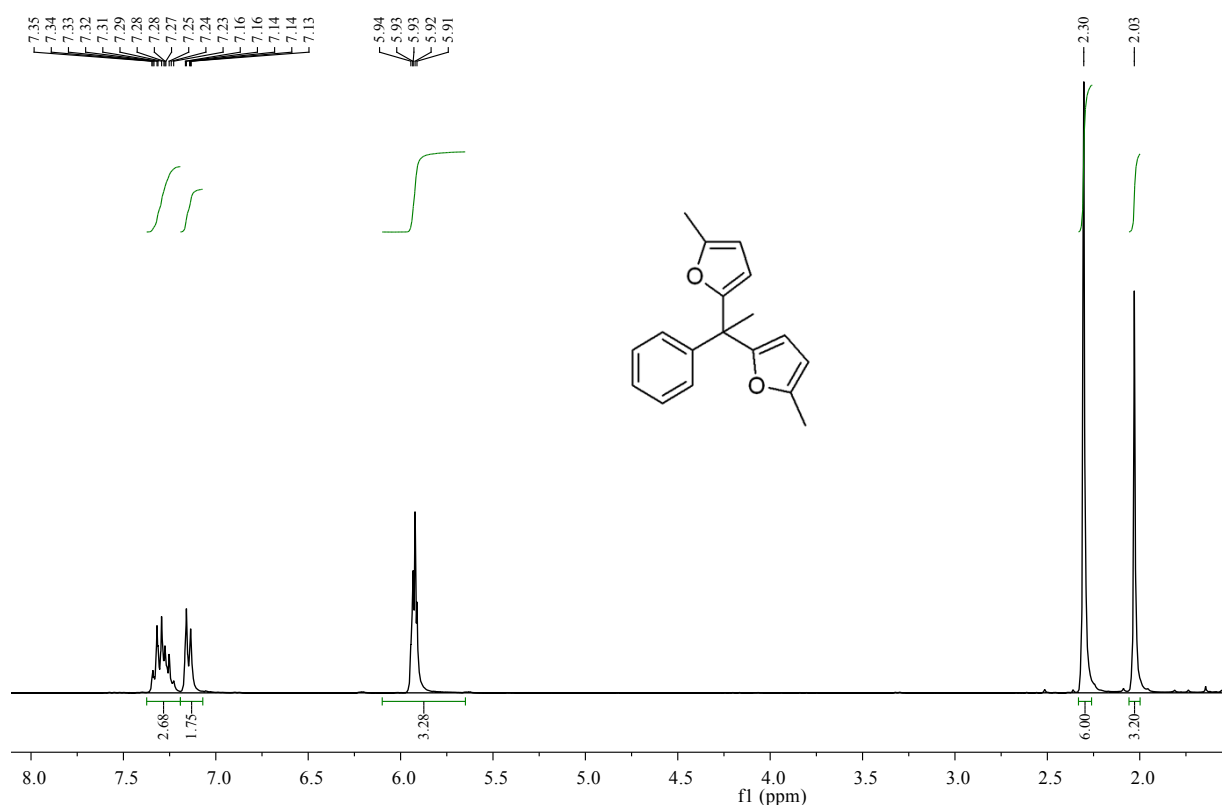

Figure S11.  $^1\text{H}$  NMR spectra (300 MHz) of **3ag**

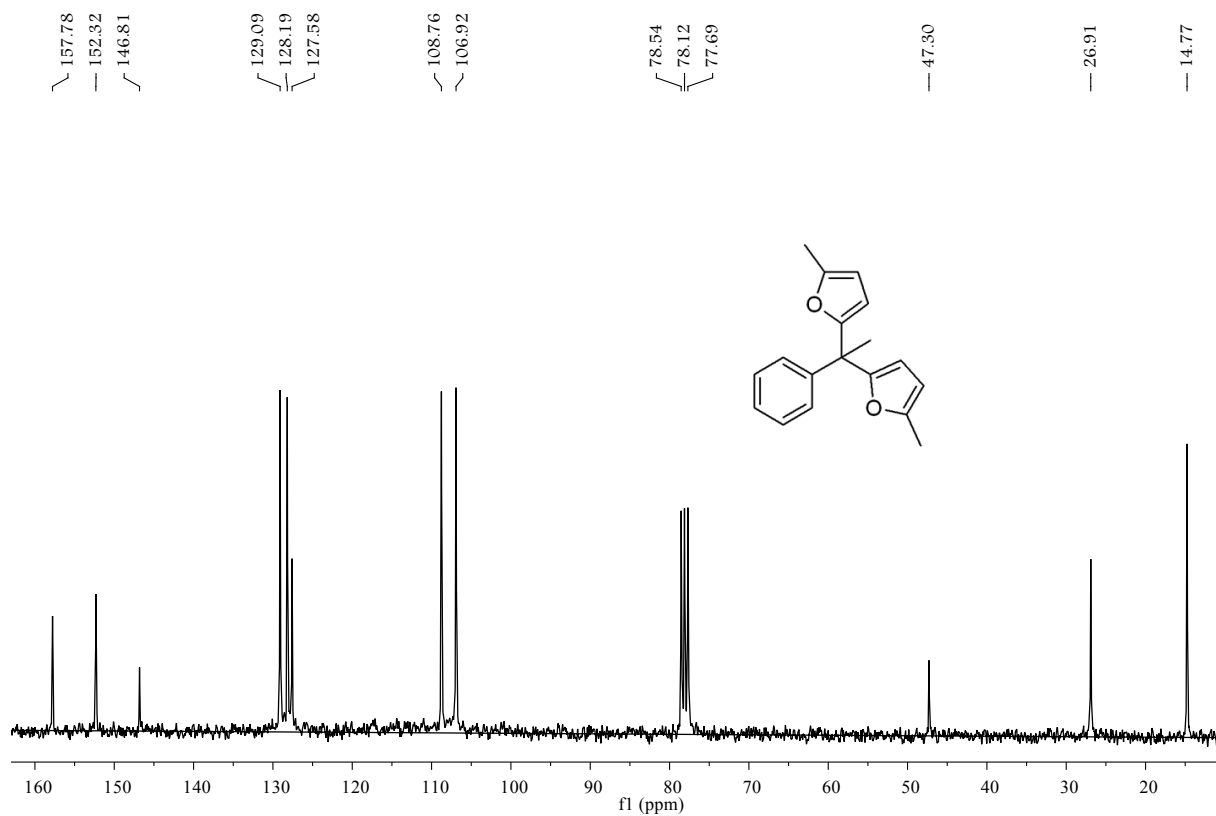

**Figure S12.**  $^{13}\text{C}$  NMR spectra (300 MHz) of **3ag**

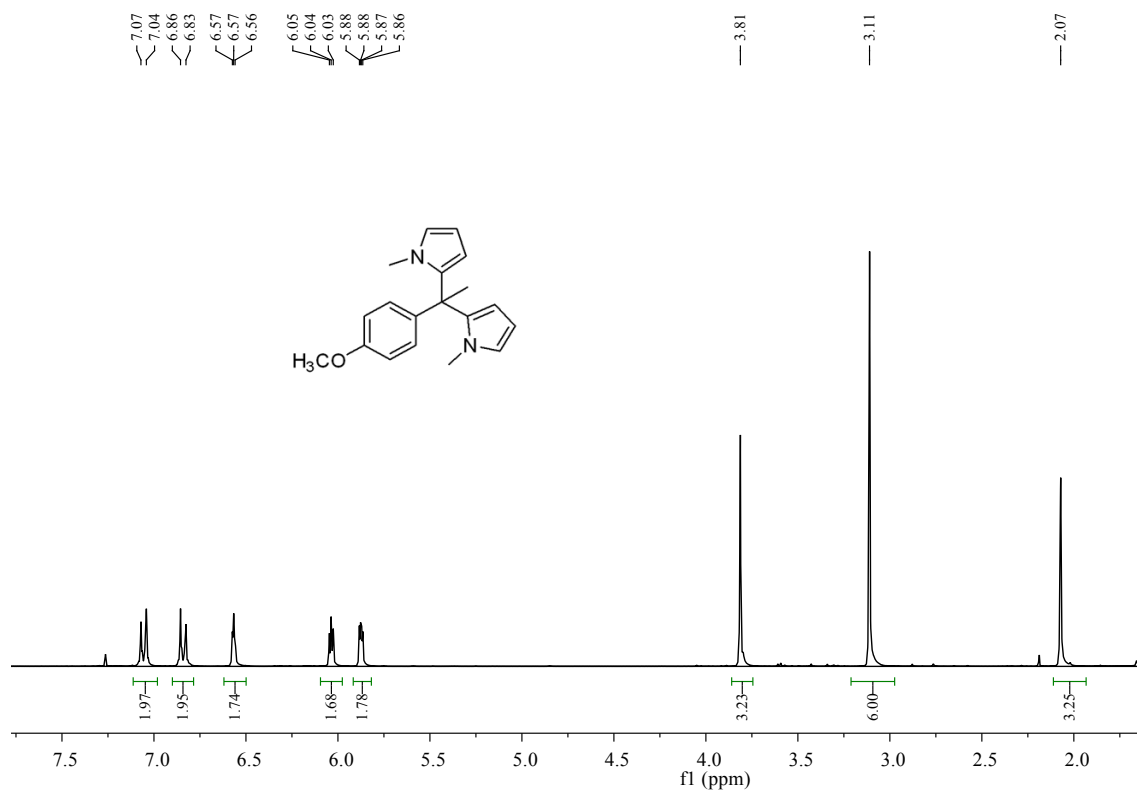

**Figure S13.**  $^1\text{H}$  NMR spectra (300 MHz) of **3ba**

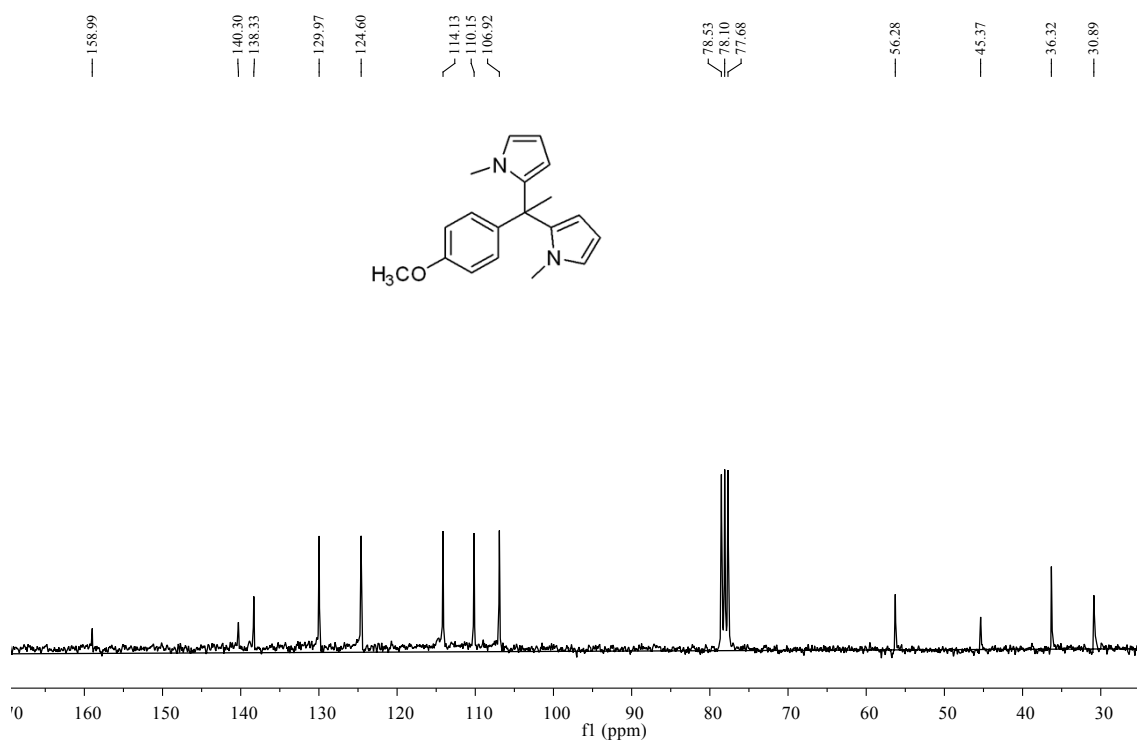

**Figure S14.** <sup>13</sup>C NMR spectra (300 MHz) of **3ba**

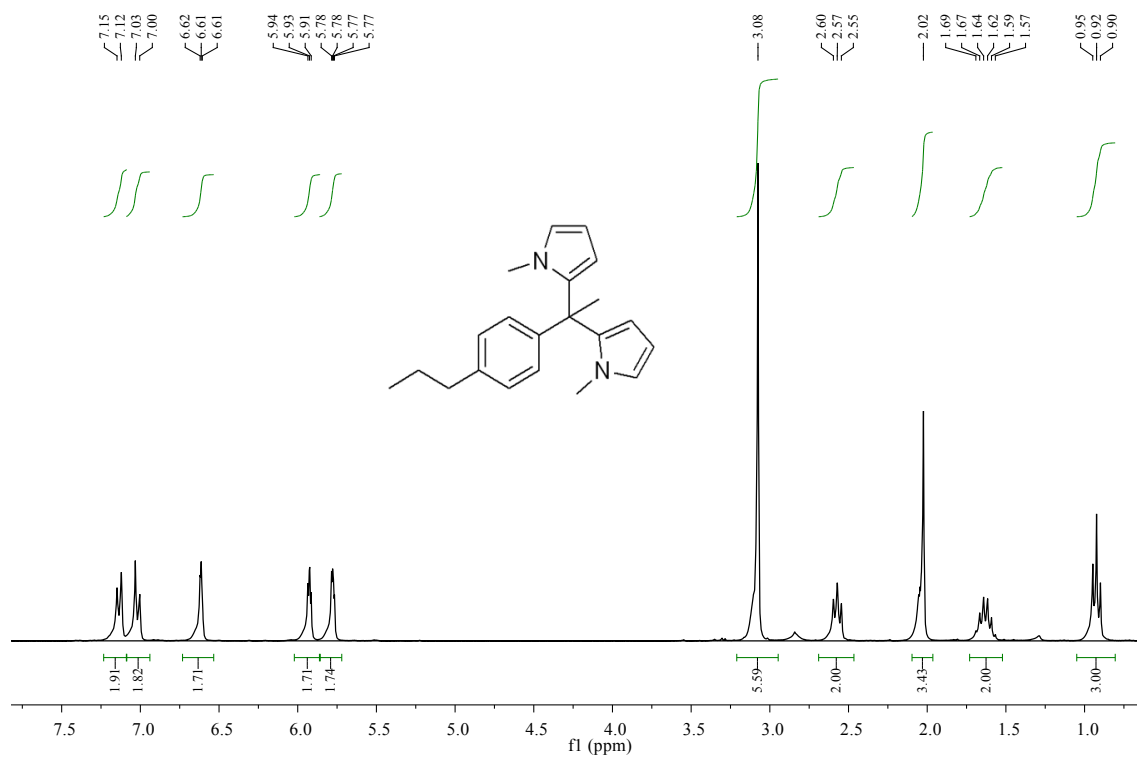

**Figure S15.** <sup>1</sup>H NMR spectra (300 MHz) of **3ca**



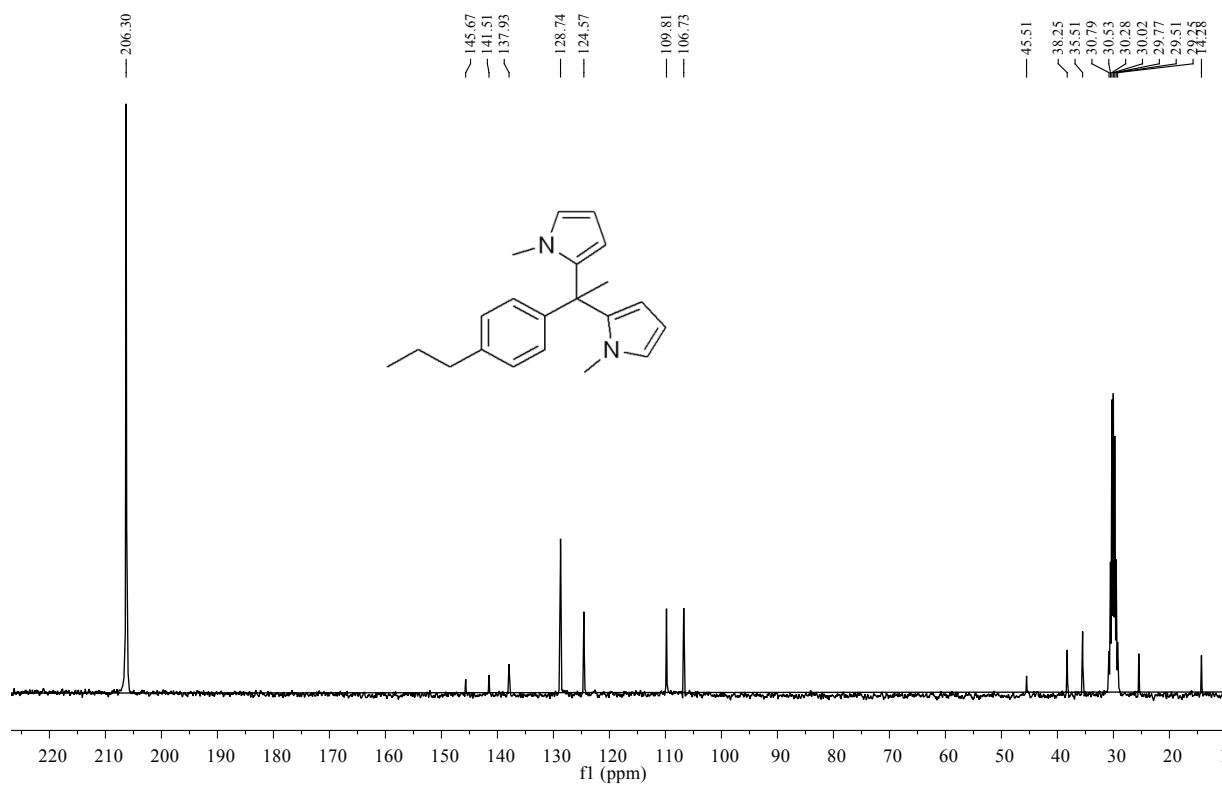

Figure S16. <sup>13</sup>C NMR spectra (300 MHz) of 3ca

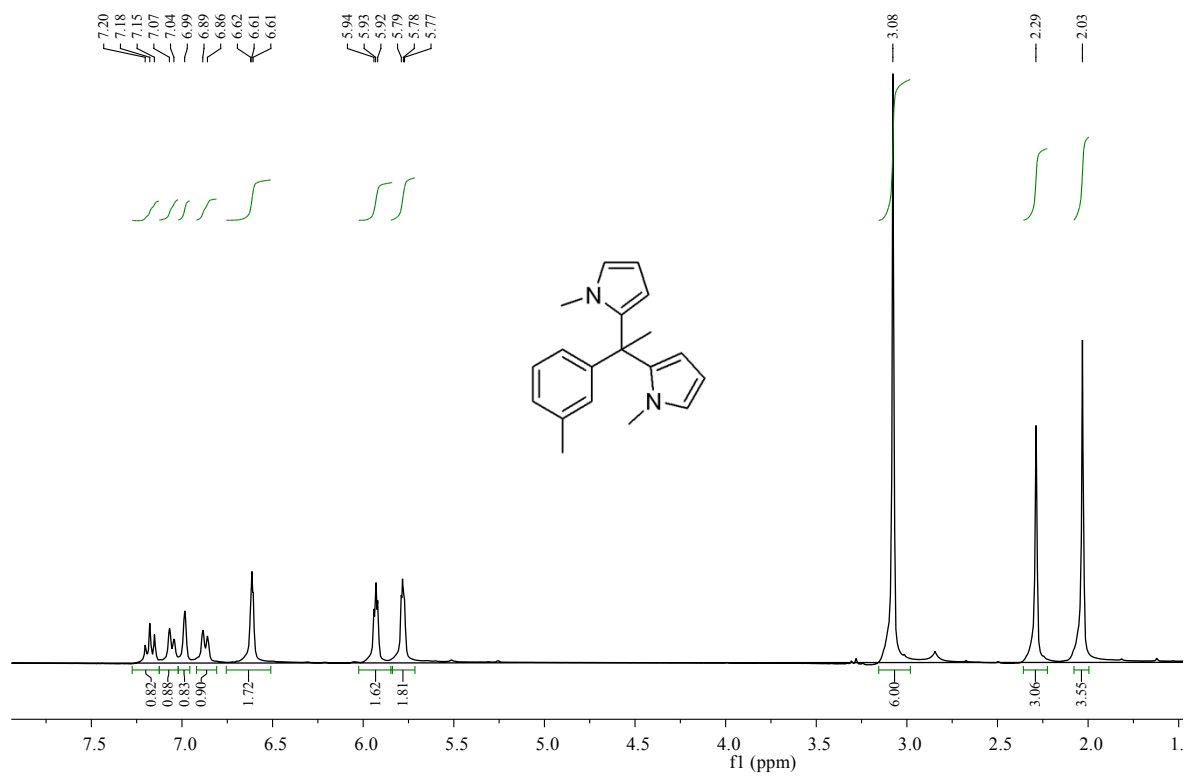

Figure S17. <sup>1</sup>H NMR spectra (300 MHz) of 3da

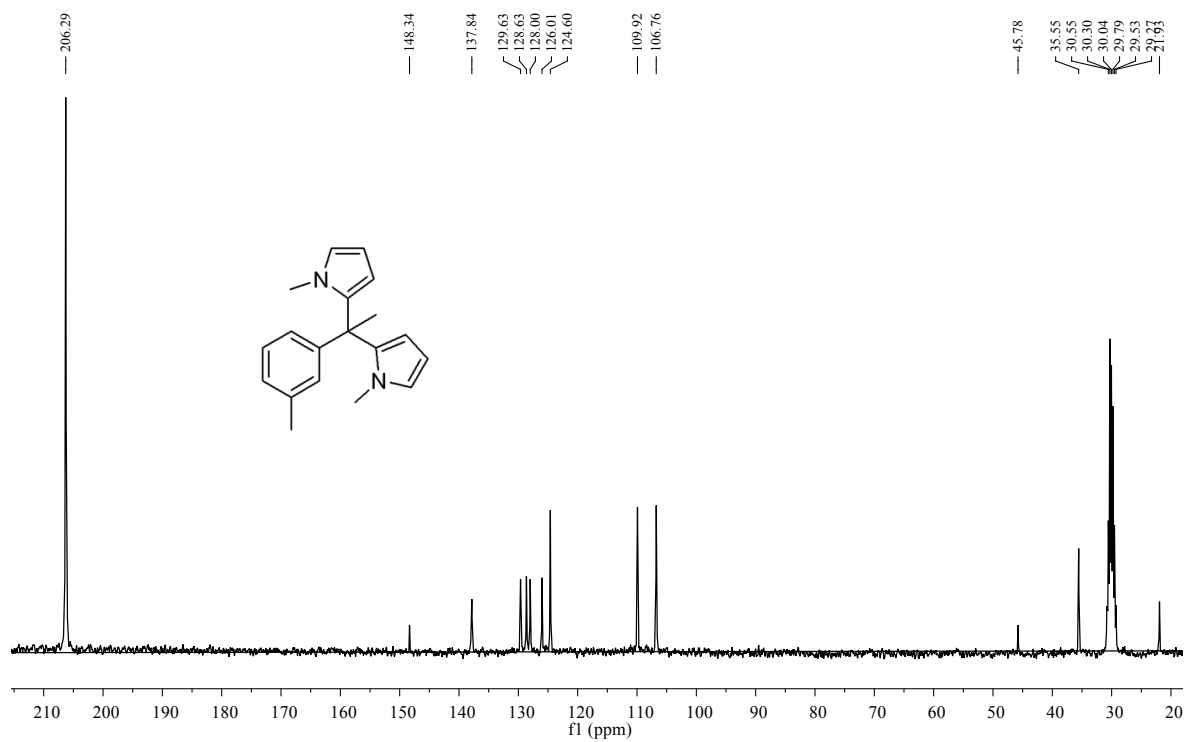

Figure S18.  $^{13}\text{C}$  NMR spectra (300 MHz) of 3da

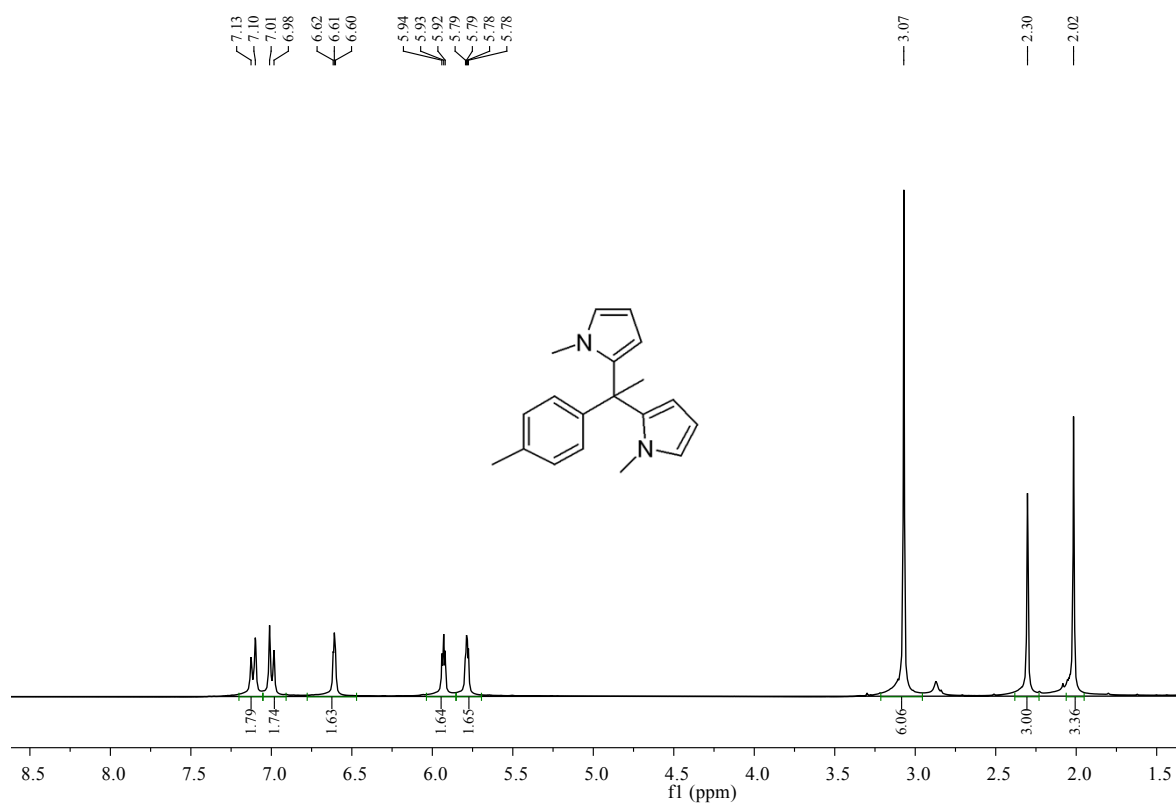

Figure S19.  $^1\text{H}$  NMR spectra (300 MHz) of 3ea

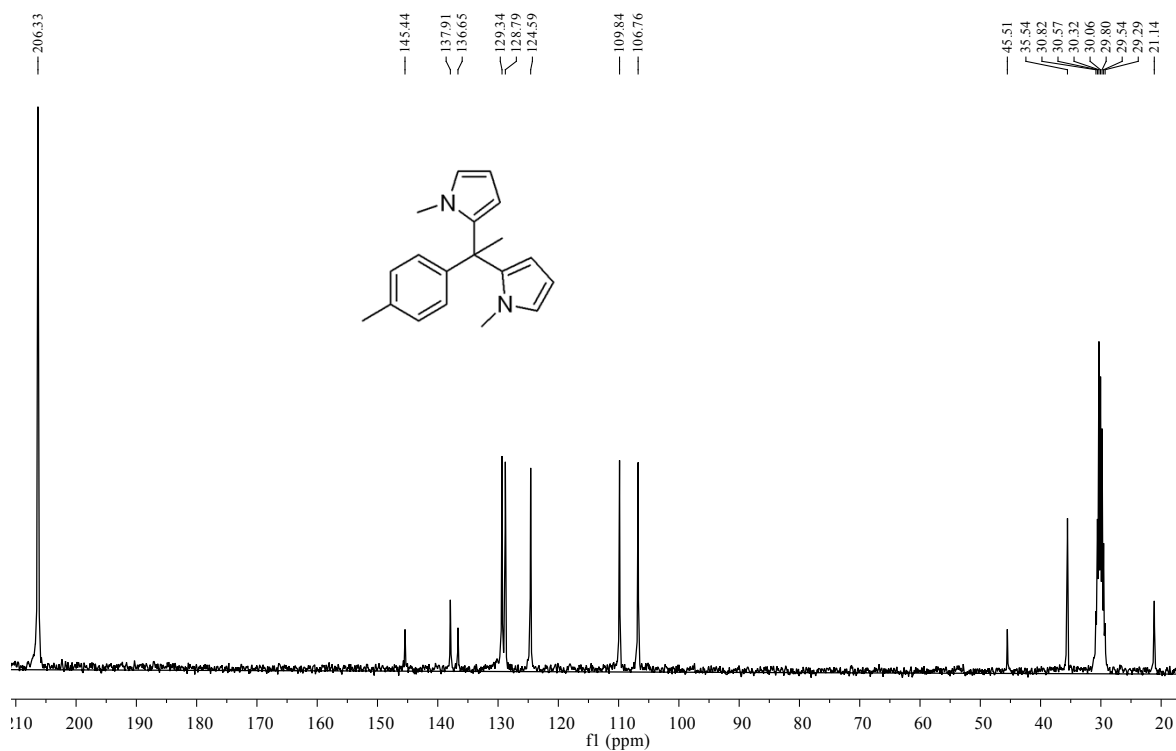

Figure S20. <sup>13</sup>C NMR spectra (300 MHz) of 3ea

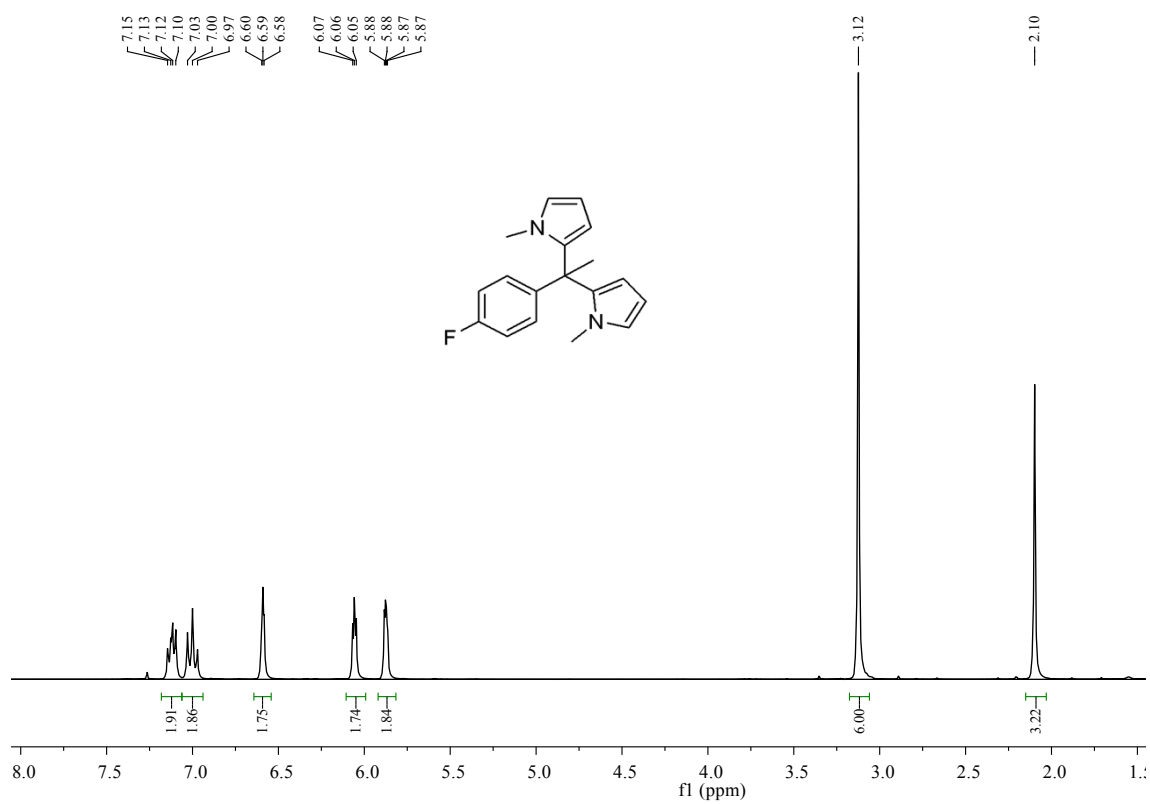

Figure S21. <sup>1</sup>H NMR spectra (300 MHz) of 3fa

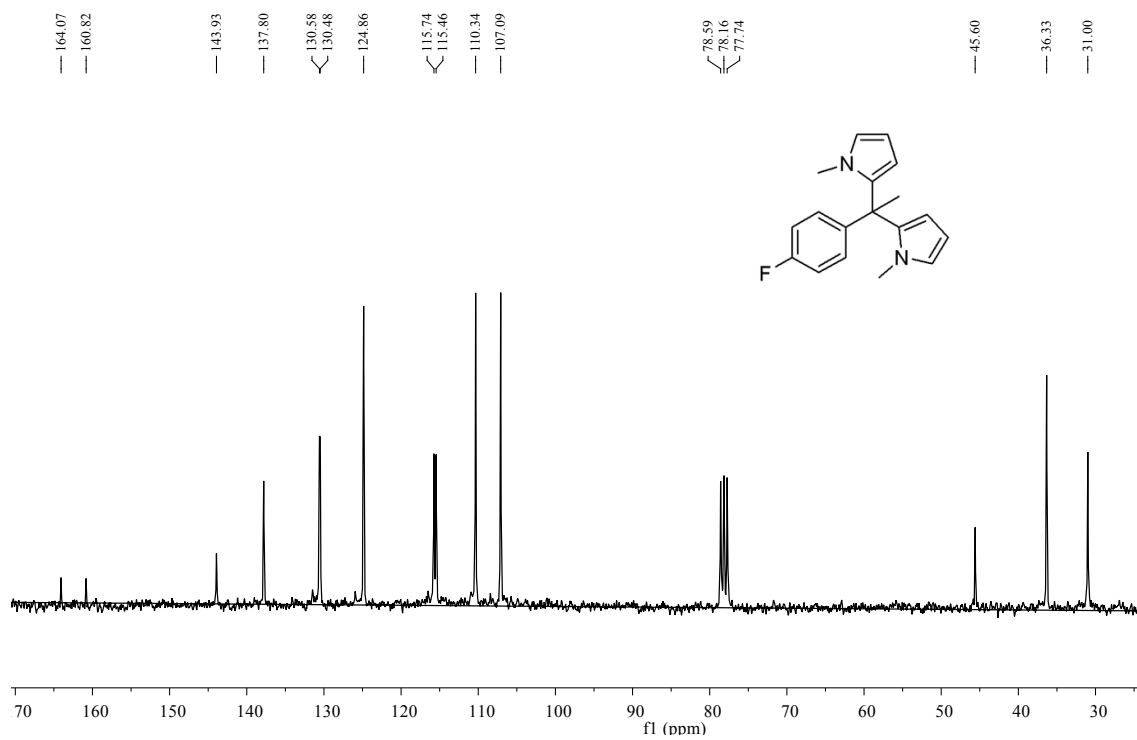

**Figure S22.** <sup>13</sup>C NMR spectra (300 MHz) of **3fa**

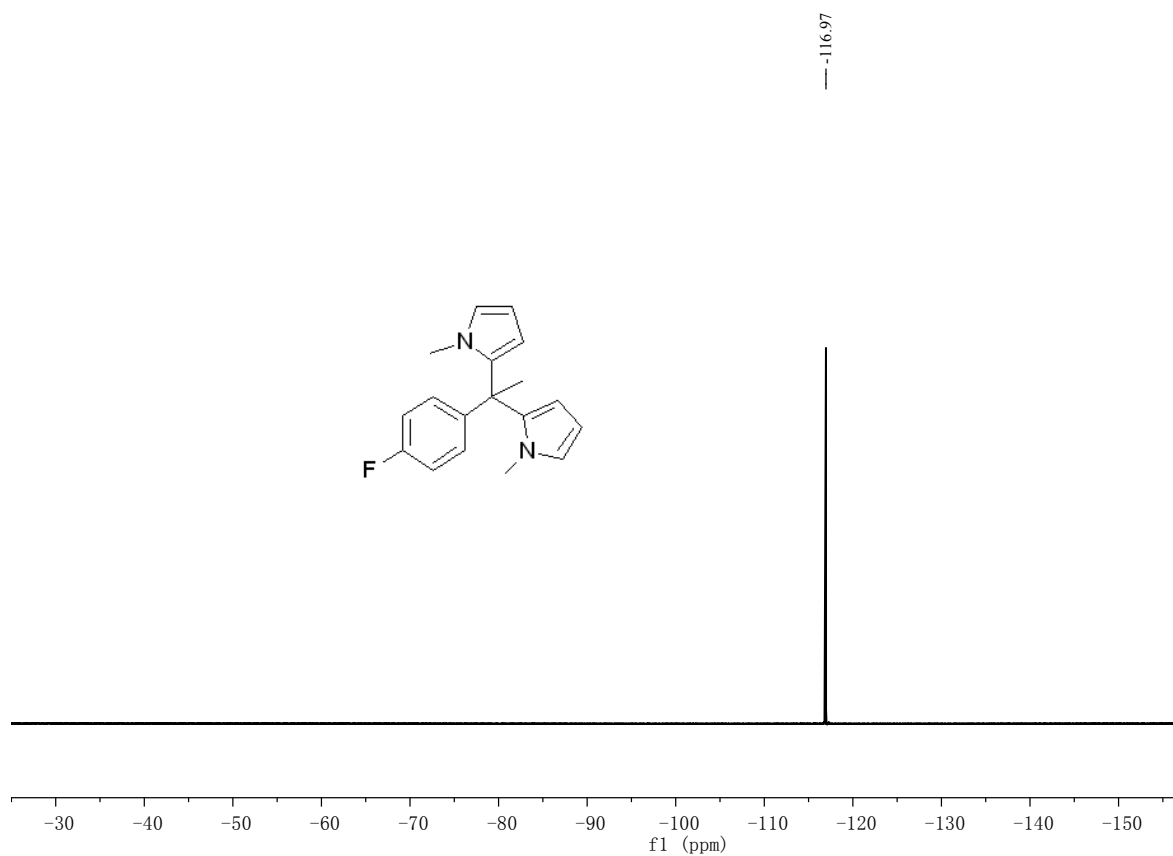

**Figure S23.** <sup>19</sup>F NMR spectra (500 MHz) of **3fa**

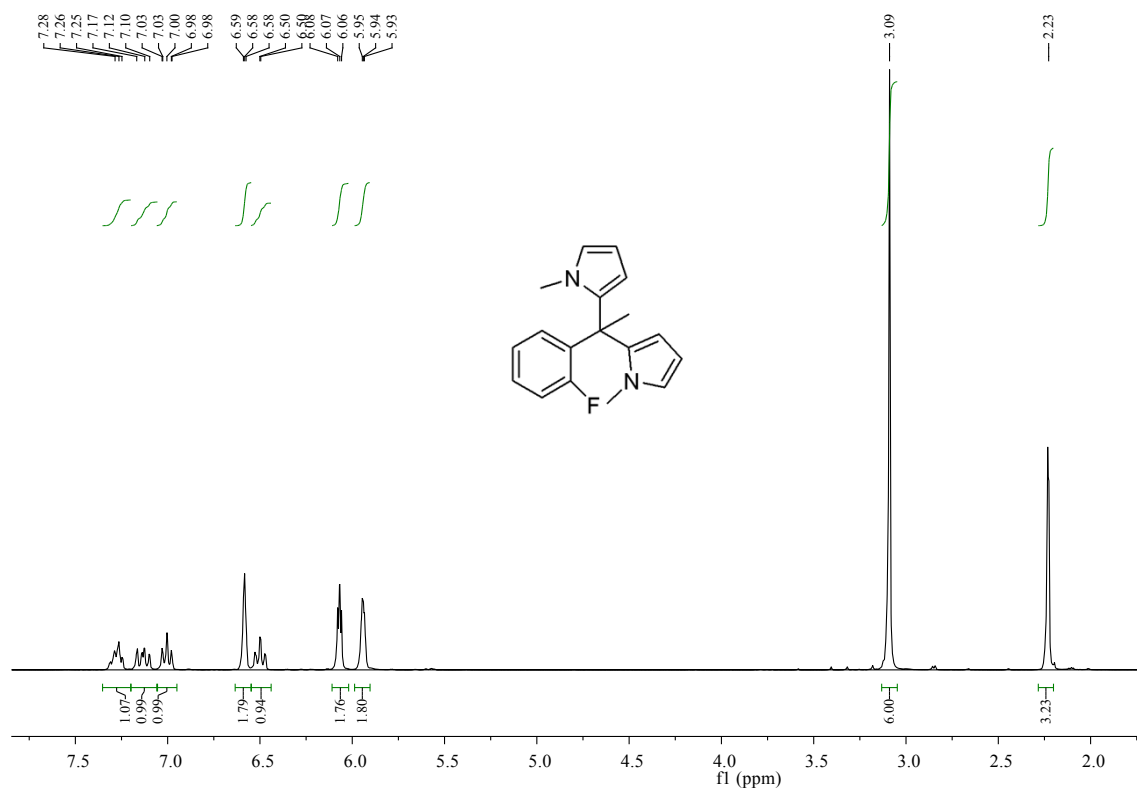

Figure S24. <sup>1</sup>H NMR spectra (300 MHz) of 3ga

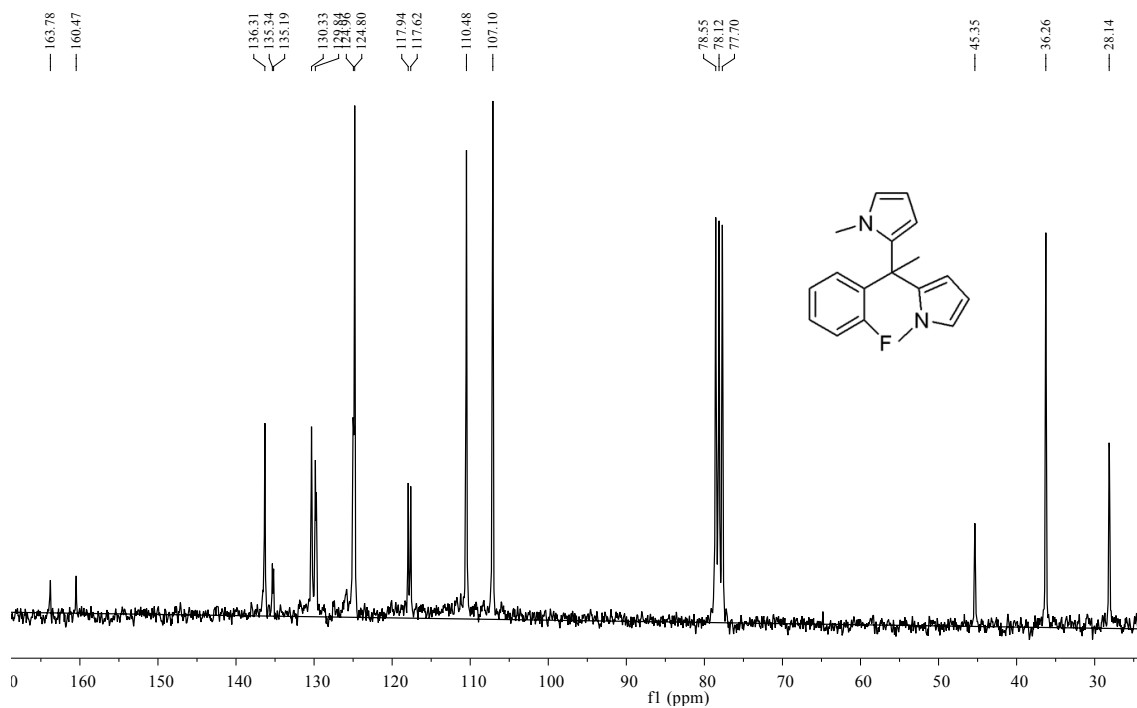

Figure S25. <sup>13</sup>C NMR spectra (300 MHz) of 3ga

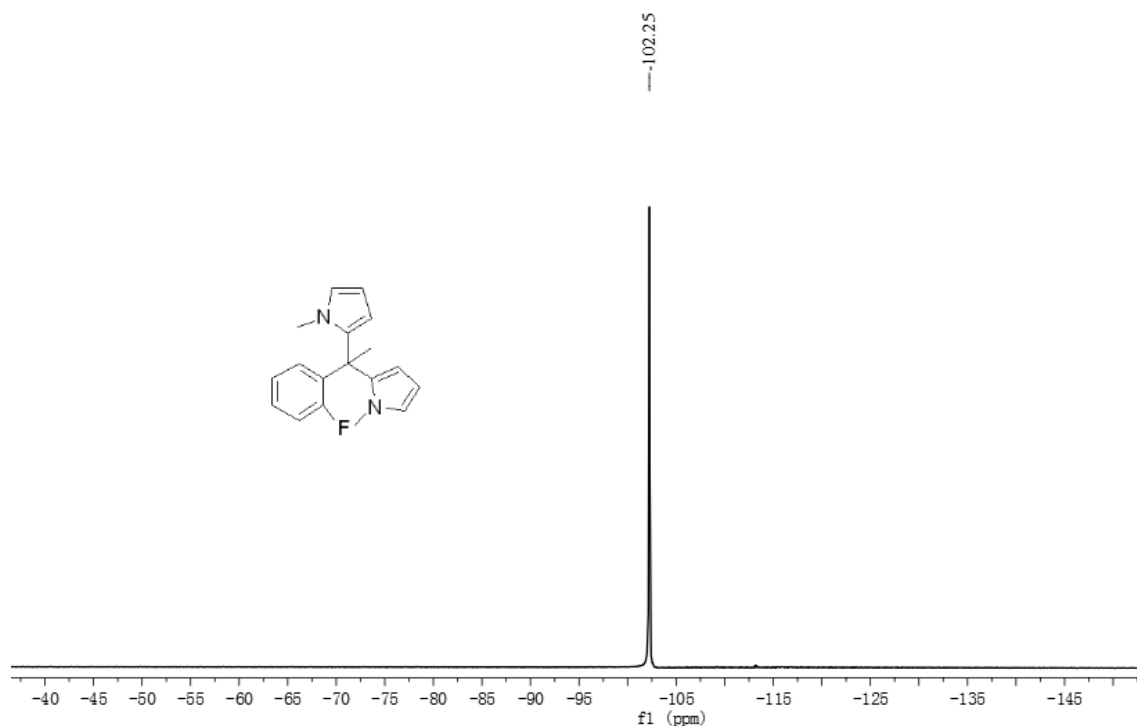

Figure S26.  $^{19}\text{F}$  NMR spectra (500 MHz) of 3ga

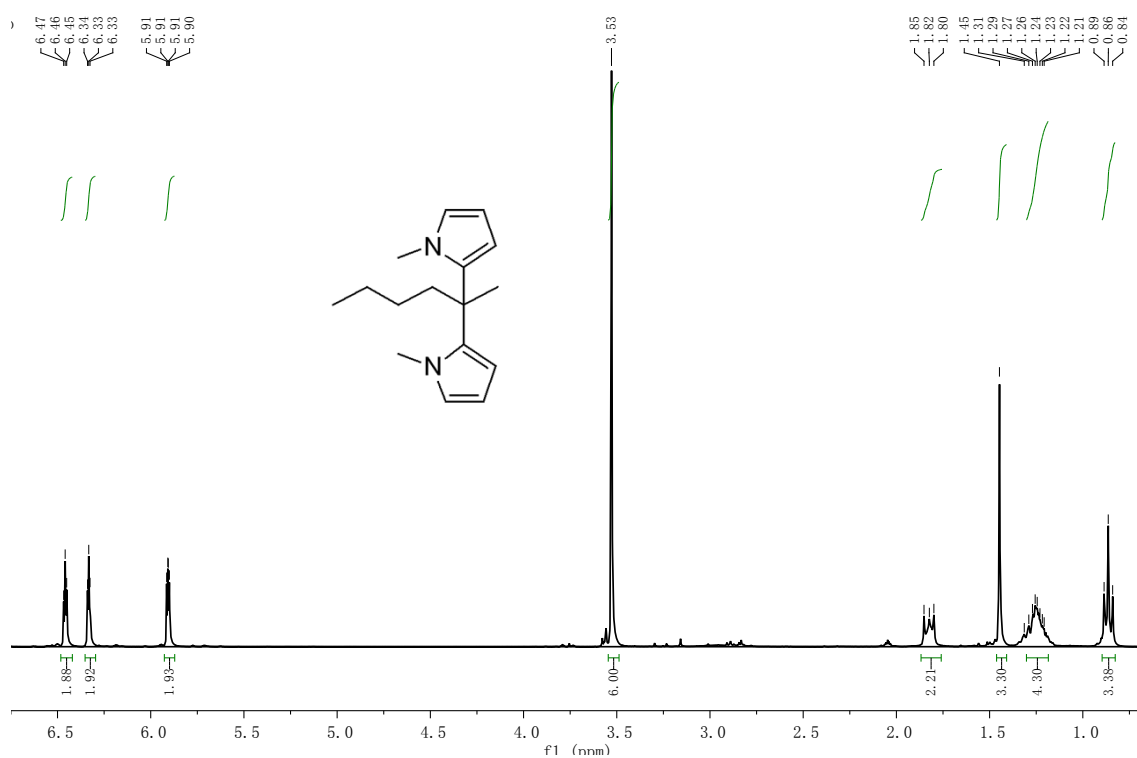

Figure S27.  $^1\text{H}$  NMR spectra (300 MHz) of 3ha

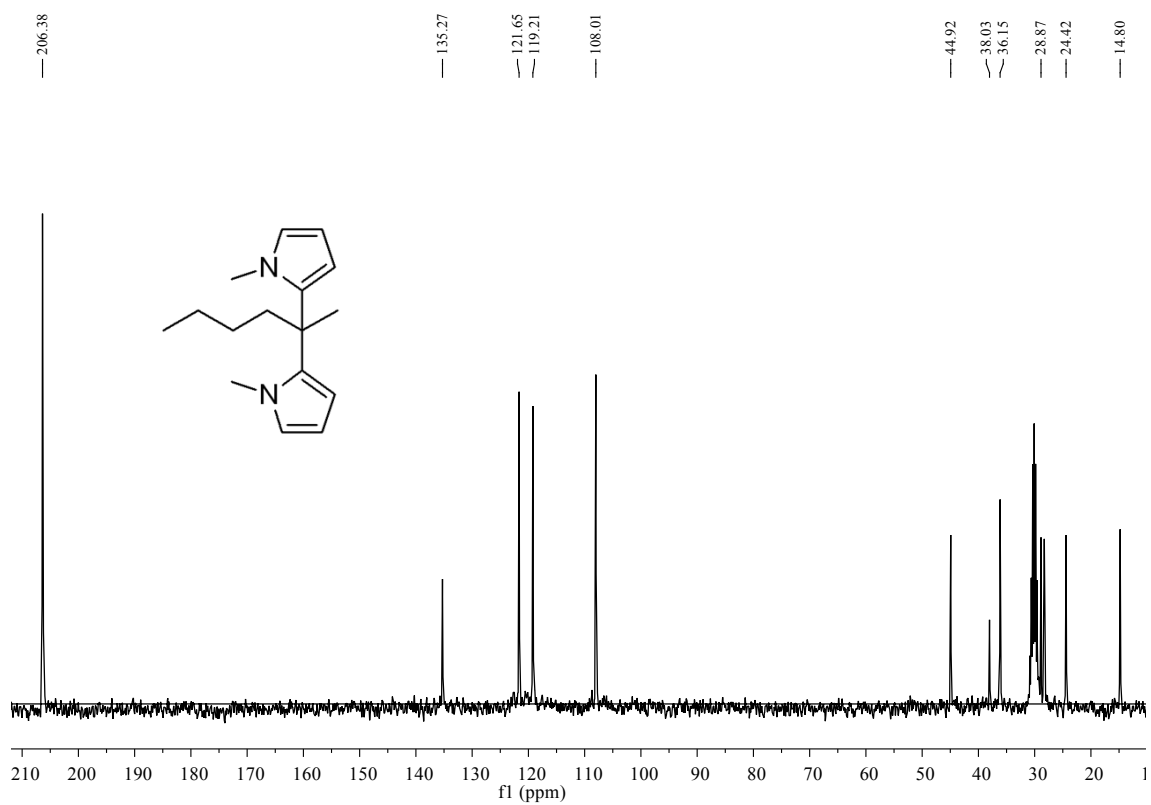

Figure S28. <sup>13</sup>C NMR spectra (300 MHz) of 3ha

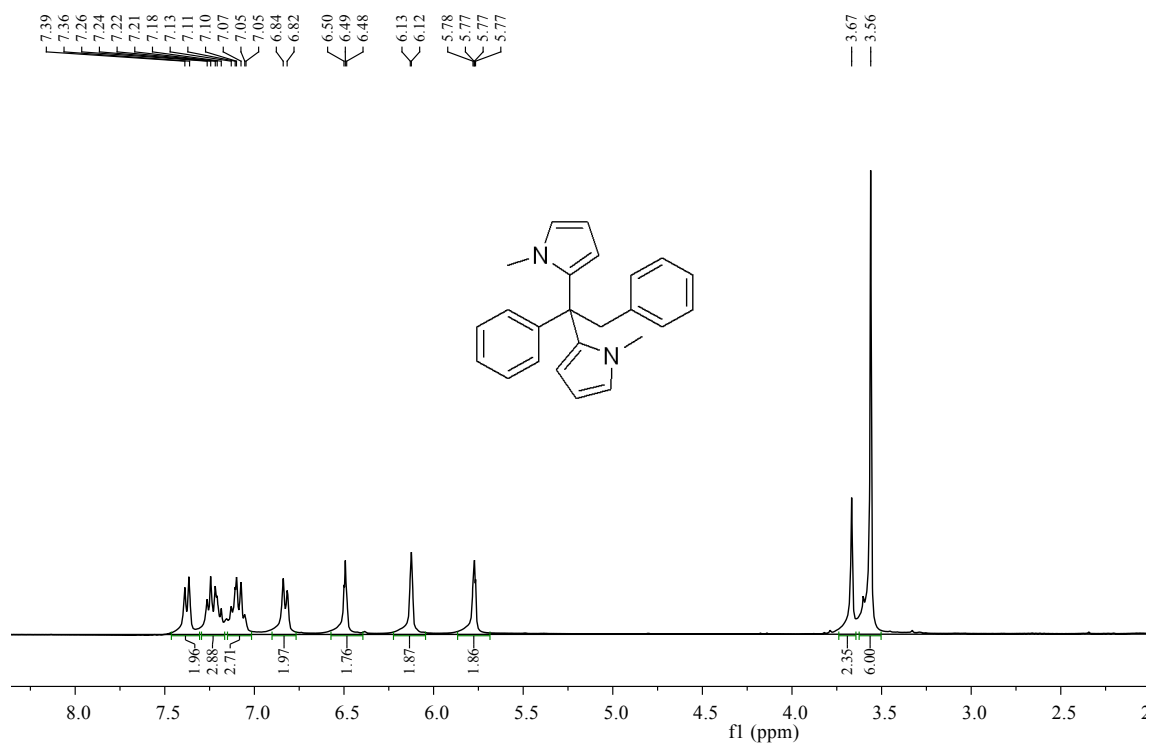

Figure S29. <sup>1</sup>H NMR spectra (300 MHz) of 3ia

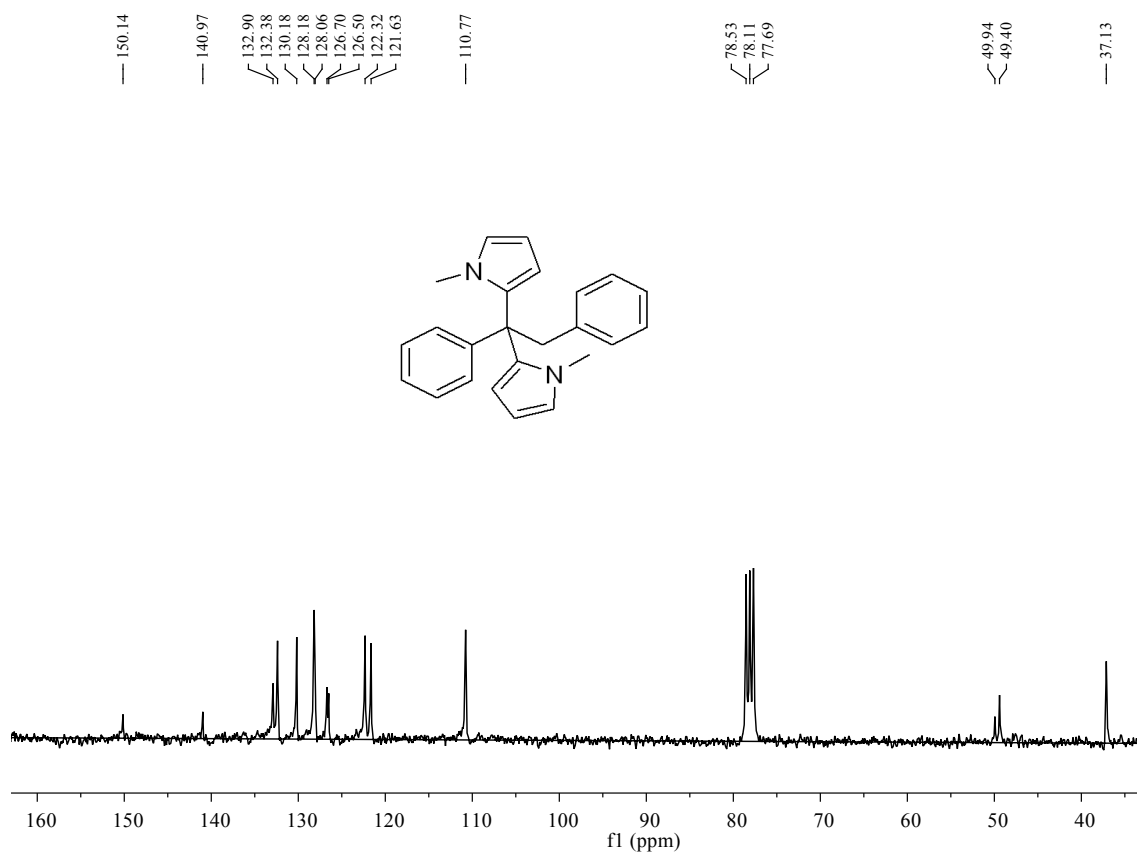

**Figure S30.**  $^{13}\text{C}$  NMR spectra (300 MHz) of **3ia**

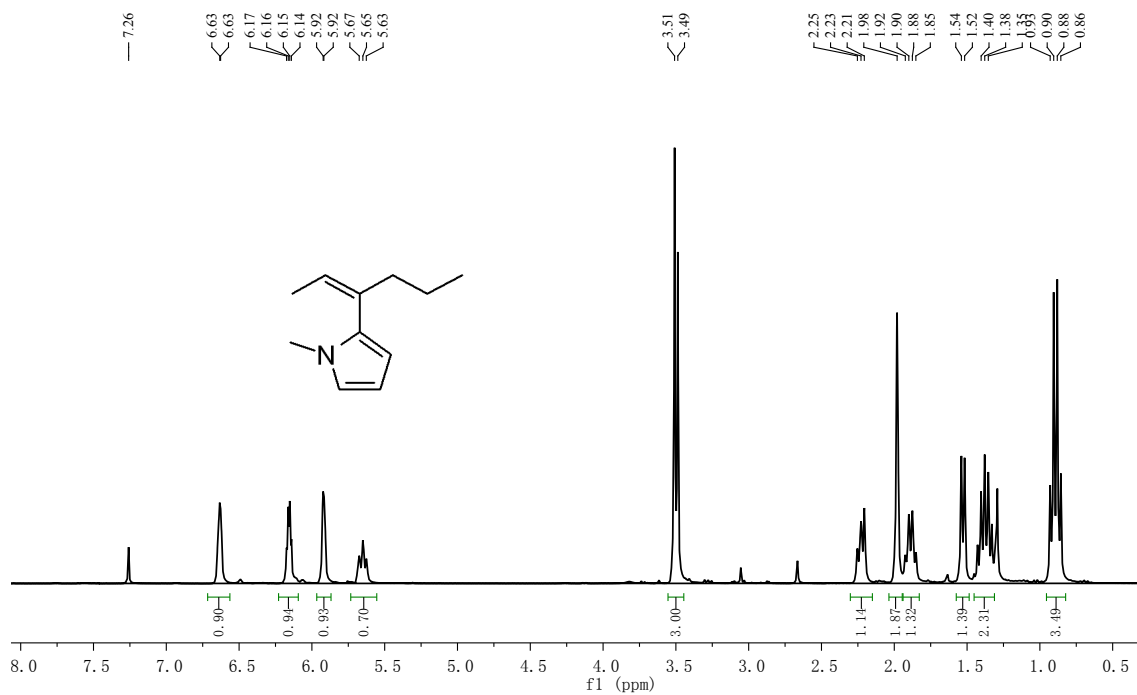

**Figure S31.**  $^1\text{H}$  NMR spectra (300 MHz) of **3ja**



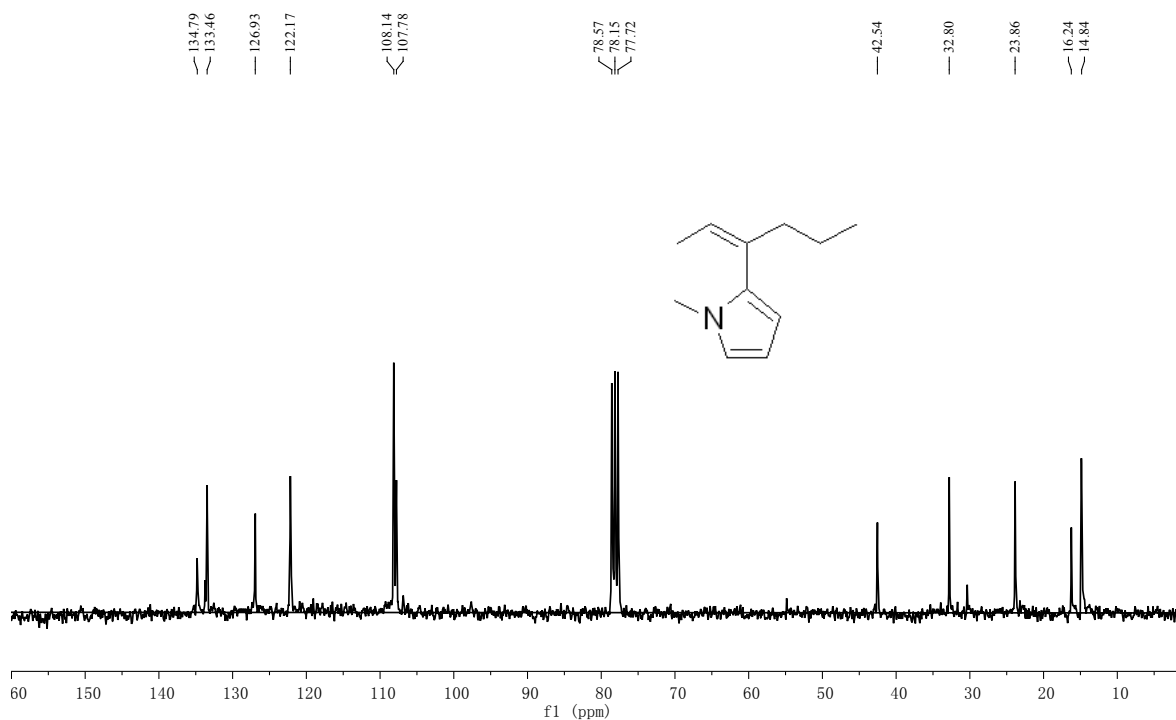

Figure S32. <sup>13</sup>C NMR spectra (300 MHz) of 3ja

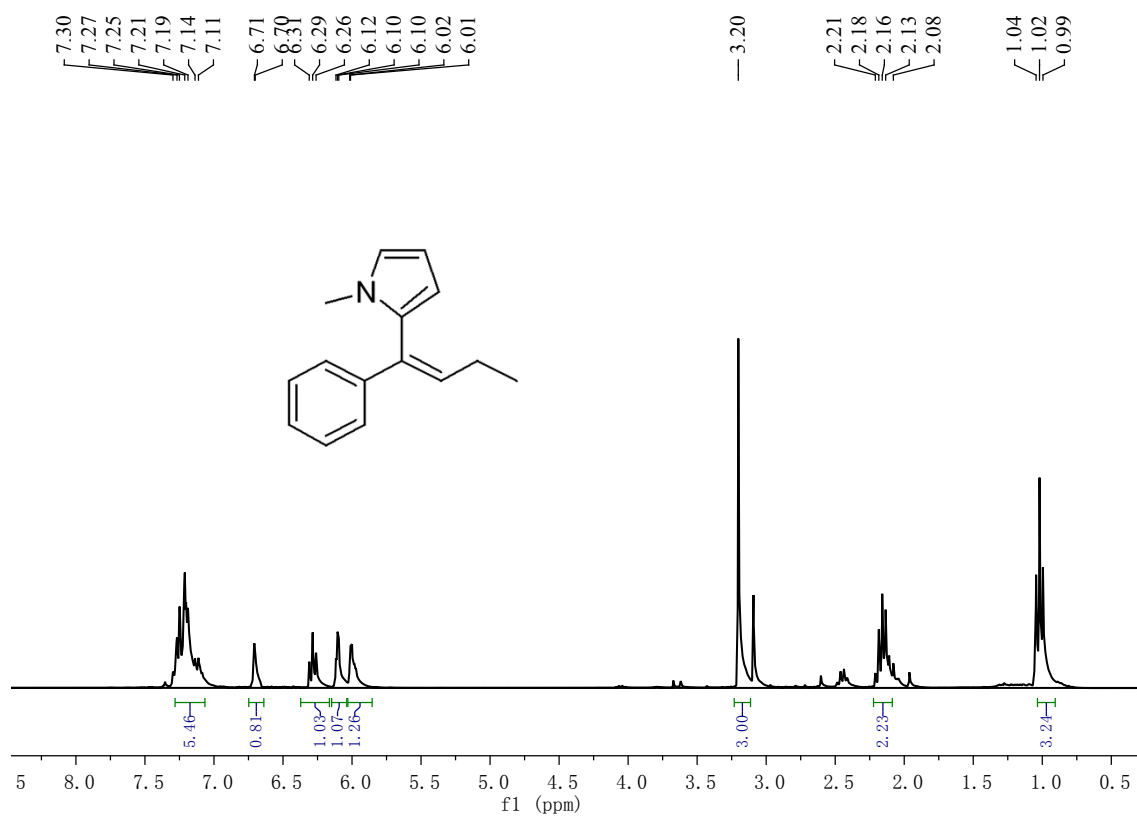

Figure S33. <sup>1</sup>H NMR spectra (300 MHz) of 3ka

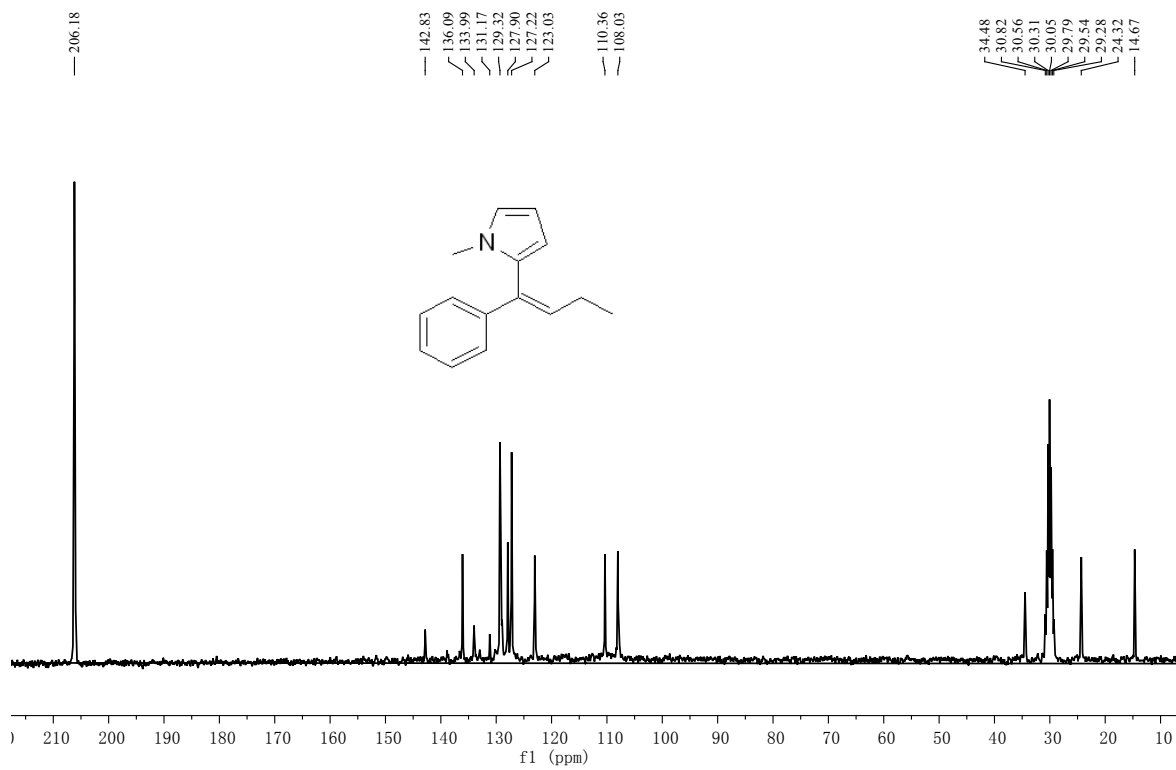

**Figure S34.** <sup>13</sup>C NMR spectra (300 MHz) of **3ka**
